# Supplementary material for: Systematic review of menstrual hygiene management requirements, its barriers and strategies for disabled people
Source: PubMed Central journal article supplement (PMC6365059; doi:10.1371/journal.pone.0210974), 2019-02-06
Supplement: pone.0210974.s003.pdf [file pone.0210974.s003.pdf]

**S2 Table. Quality assessment of all studies**

|                                                                                         | Altundag 2015 | Carnaby 2002 | Charlifue 1992 | Chou 2009 | Chou 2012 | Patage 2015 | Goldstein 1988 | Hamilton 2011 | Ibralic 2010 | Kirkham 2013 | Kyrkou 2005 | Lin 2011 | Lin 2011 | Mason 2007 | Obaydi 2008 | Perrin 1976 | Ranganath 2012 | Rodgers 2005 | Thapa 2017 | Van der Merwe 1987 | van Schroyen-Lantman-deValk 2011 | White 2016 |
|-----------------------------------------------------------------------------------------|---------------|--------------|----------------|-----------|-----------|-------------|----------------|---------------|--------------|--------------|-------------|----------|----------|------------|-------------|-------------|----------------|--------------|------------|--------------------|----------------------------------|------------|
| <b>Quantitative studies</b>                                                             |               |              |                |           |           |             |                |               |              |              |             |          |          |            |             |             |                |              |            |                    |                                  |            |
| <b>1. Sampling methods</b>                                                              |               |              |                |           |           |             |                |               |              |              |             |          |          |            |             |             |                |              |            |                    |                                  |            |
| 1.1 Was the sample representative of the broader population?                            | 3             | N/A*         | 3              | 2         | N/A       | 3           | 2              | 3             | 2            | 3            | 2           | 3        | 3        | N/A        | 2           | N/A         | 1              | 2            | N/A        | 3                  | 3                                | N/A        |
| 1.2 Was recruitment of participants appropriate to the study question?                  | 3             | N/A          | 3              | 3         | N/A       | 3           | 3              | 3             | 2            | 3            | 3           | 3        | 3        | N/A        | 3           | N/A         | 2              | 3            | N/A        | 3                  | 3                                | N/A        |
| 1.3 Adequate sample size (>100 or sample size calculation undertaken)                   | 2             | N/A          | 3              | 2         | N/A       | 2           | 2              | 1             | 2            | 3            | 2           | 3        | 3        | N/A        | 2           | N/A         | 1              | 3            | N/A        | 1                  | 3                                | N/A        |
| 1.4 Response rate reported and acceptable (≥70%)                                        | 2             | N/A          | 3              | 3         | N/A       | 1           | 1              | 1             | 2            | 2            | 2           | 3        | 3        | N/A        | 2           | N/A         | 1              | 2            | N/A        | 1                  | 3                                | N/A        |
| 1.5 Control group is appropriate, clearly defined (if applicable)                       | N/A           | N/A          | N/A            | N/A       | N/A       | N/A         | 3              | N/A           | N/A          | N/A          | N/A         | N/A      | N/A      | N/A        | 3           | N/A         | N/A            | N/A          | N/A        | N/A                | N/A                              | N/A        |
| <b>2. Data collection</b>                                                               |               |              |                |           |           |             |                |               |              |              |             |          |          |            |             |             |                |              |            |                    |                                  |            |
| 2.1 Sample characteristics clearly described                                            | 1             | N/A          | 3              | 3         | N/A       | 3           | 3              | 3             | 2            | 3            | 1           | 3        | 3        | N/A        | 2           | N/A         | 1              | 3            | N/A        | 3                  | 3                                | N/A        |
| 2.2 Means of collecting data (e.g. assessment tool, questionnaire, etc) valid, reliable | 2             | N/A          | 3              | 3         | N/A       | 3           | 3              | 3             | 3            | 3            | 2           | 3        | 3        | N/A        | 3           | N/A         | 3              | 2            | N/A        | 2                  | 2                                | N/A        |
| <b>3. Data analysis / interpretation</b>                                                |               |              |                |           |           |             |                |               |              |              |             |          |          |            |             |             |                |              |            |                    |                                  |            |
| 3.1 Potential confounders                                                               | 1             | N/A          | 1              | 2         | N/A       | 2           | 2              | 1             | 2            | 2            | 2           | 2        | 2        | N/A        | 2           |             | 1              | 1            |            | 1                  | 2                                |            |

|                                                                                                                                                                                                                                                             |     |     |     |     |     |     |     |     |     |     |     |     |     |     |     |   |     |     |   |     |     |   |  |
|-------------------------------------------------------------------------------------------------------------------------------------------------------------------------------------------------------------------------------------------------------------|-----|-----|-----|-----|-----|-----|-----|-----|-----|-----|-----|-----|-----|-----|-----|---|-----|-----|---|-----|-----|---|--|
| taken into account during the analysis and interpretation                                                                                                                                                                                                   |     |     |     |     |     |     |     |     |     |     |     |     |     |     |     |   |     |     |   |     |     |   |  |
| 3.2 Tests for statistical significance undertaken, presented                                                                                                                                                                                                | 2   | N/A | 3   | 3   | N/A | 1   | 3   | 3   | 3   | 3   | 1   | 3   | 3   | N/A | 3   |   | 1   | 3   |   | 1   | 3   |   |  |
| <b>Qualitative studies (adapted from RATS)</b>                                                                                                                                                                                                              |     |     |     |     |     |     |     |     |     |     |     |     |     |     |     |   |     |     |   |     |     |   |  |
| <b>1. Study design</b>                                                                                                                                                                                                                                      |     |     |     |     |     |     |     |     |     |     |     |     |     |     |     |   |     |     |   |     |     |   |  |
| 1.1 Study design is appropriate to the research question                                                                                                                                                                                                    | N/A | 1   | N/A | N/A | 3   | N/A | N/A | N/A | N/A | N/A | N/A | N/A | N/A | 3   | N/A | 2 | N/A | N/A | 3 | N/A | N/A | 3 |  |
| 1.1.2 Could a quantitative approach have worked better?                                                                                                                                                                                                     | N/A | 1   | N/A | N/A | 3   | N/A | N/A | N/A | N/A | N/A | N/A | N/A | N/A | 3   | N/A | 2 | N/A | N/A | 3 | N/A | N/A | 3 |  |
| 1.1.3 Justified why a particular method was chosen, e.g.:<br>a)Interviews: experience, perceptions, behaviour, practice; b) Focus groups: group dynamics, convenience, non-sensitive topics; c) Ethnography: culture, organizational behaviour, interaction | N/A | 1   | N/A | N/A | 3   | N/A | N/A | N/A | N/A | N/A | N/A | N/A | N/A | 3   | N/A | 2 | N/A | N/A | 3 | N/A | N/A | 3 |  |
| <b>2. Sampling methods</b>                                                                                                                                                                                                                                  |     |     |     |     |     |     |     |     |     |     |     |     |     |     |     |   |     |     |   |     |     |   |  |
| 2.1 Criteria for selecting study sample is appropriate, e.g. purposive (diversity of opinion), random (generalizable)                                                                                                                                       | N/A | 2   | N/A | N/A | 3   | N/A | N/A | N/A | N/A | N/A | N/A | N/A | N/A | 3   | N/A | 2 | N/A | N/A | 3 | N/A | N/A | 3 |  |

|                                                                                                                                                                                                                                                                                                                               |     |   |     |     |   |     |     |     |     |     |     |     |     |   |     |   |     |     |   |     |     |   |
|-------------------------------------------------------------------------------------------------------------------------------------------------------------------------------------------------------------------------------------------------------------------------------------------------------------------------------|-----|---|-----|-----|---|-----|-----|-----|-----|-----|-----|-----|-----|---|-----|---|-----|-----|---|-----|-----|---|
| to broader population), volunteer (hard to reach groups)                                                                                                                                                                                                                                                                      |     |   |     |     |   |     |     |     |     |     |     |     |     |   |     |   |     |     |   |     |     |   |
| 2.2 Details given of how recruitment was conducted and by whom                                                                                                                                                                                                                                                                | N/A | 2 | N/A | N/A | 3 | N/A | N/A | N/A | N/A | N/A | N/A | N/A | N/A | 3 | N/A | 3 | N/A | N/A | 3 | N/A | N/A | 3 |
| 2.3 Details given on who chose not to participate and why                                                                                                                                                                                                                                                                     | N/A | 2 | N/A | N/A | 3 | N/A | N/A | N/A | N/A | N/A | N/A | N/A | N/A | 2 | N/A | 2 | N/A | N/A | 3 | N/A | N/A | 2 |
| 3. Data collection                                                                                                                                                                                                                                                                                                            |     |   |     |     |   |     |     |     |     |     |     |     |     |   |     |   |     |     |   |     |     |   |
| 3.1 Collection of data is comprehensive and appropriate. E.g. a) Was the study setting appropriate? E.g. protection of confidentiality for sensitive discussions; b) Is the role of the researcher(s) appropriate? How might they bias the study and results? e.g. Do researchers occupy dual roles (clinician and researcher | N/A | 2 | N/A | N/A | 3 | N/A | N/A | N/A | N/A | N/A | N/A | N/A | N/A | 2 | N/A | 2 | N/A | N/A | 3 | N/A | N/A | 3 |
| 4. Data analysis/interpretation                                                                                                                                                                                                                                                                                               |     |   |     |     |   |     |     |     |     |     |     |     |     |   |     |   |     |     |   |     |     |   |
| 4.1 Are interpretations clearly presented and supported adequately by evidence?                                                                                                                                                                                                                                               | N/A | 3 | N/A | N/A | 3 | N/A | N/A | N/A | N/A | N/A | N/A | N/A | N/A | 2 | N/A | 3 | N/A | N/A | 3 | N/A | N/A | 3 |
| 4.2 Indicators of quality                                                                                                                                                                                                                                                                                                     |     |   |     |     |   |     |     |     |     |     |     |     |     |   |     |   |     |     |   |     |     |   |
| - Description of how themes were derived from the data                                                                                                                                                                                                                                                                        | N/A | 2 | N/A | N/A | 3 | N/A | N/A | N/A | N/A | N/A | N/A | N/A | N/A | 3 | N/A | 2 | N/A | N/A | 3 | N/A | N/A | 3 |

|                                                                                                 |     |    |     |     |    |     |     |     |     |     |     |     |     |    |     |    |     |     |    |     |     |    |  |
|-------------------------------------------------------------------------------------------------|-----|----|-----|-----|----|-----|-----|-----|-----|-----|-----|-----|-----|----|-----|----|-----|-----|----|-----|-----|----|--|
| (inductive or deductive)                                                                        |     |    |     |     |    |     |     |     |     |     |     |     |     |    |     |    |     |     |    |     |     |    |  |
| - Semi quantification when appropriate                                                          | N/A | 3  | N/A | N/A | 3  | N/A | N/A | N/A | N/A | N/A | N/A | N/A | N/A | 3  | N/A | 2  | N/A | N/A | 3  | N/A | N/A | 3  |  |
| - Quote use appropriate, effective                                                              | N/A | 3  | N/A | N/A | 3  | N/A | N/A | N/A | N/A | N/A | N/A | N/A | N/A | 3  | N/A | 3  | N/A | N/A | 3  | N/A | N/A | 3  |  |
| -Analysis /presentation of negative/deviant cases, alternative explanations                     | N/A | 2  | N/A | N/A | 2  | N/A | N/A | N/A | N/A | N/A | N/A | N/A | N/A | 2  | N/A | 2  | N/A | N/A | 2  | N/A | N/A | 2  |  |
| -Method of reliability check (e.g. triangulation, independent review of data to contest themes) | N/A | 1  | N/A | N/A | 3  | N/A | N/A | N/A | N/A | N/A | N/A | N/A | N/A | 3  | N/A | 1  | N/A | N/A | 2  | N/A | N/A | 2  |  |
| 4.3 Are findings generalizable to a broader population?                                         | N/A | 2  | N/A | N/A | 3  | N/A | N/A | N/A | N/A | N/A | N/A | N/A | N/A | 3  | N/A | 1  | N/A | N/A | 3  | N/A | N/A | 3  |  |
|                                                                                                 | 16  | 27 | 22  | 21  | 41 | 18  | 22  | 18  | 18  | 22  | 15  | 23  | 23  | 38 | 22  | 29 | 11  | 19  | 40 | 15  | 22  | 39 |  |
| <b>Grading</b>                                                                                  | +   | ++ | ++  | ++  | ++ | +   | ++  | +   | +   | ++  | +   | ++  | ++  | ++ | ++  | +  | -   | +   | ++ | -   | ++  | ++ |  |

\*N/A marked under quantitative criteria for qualitative studies and vice versa.

**RUBRIC**

- ++ Low risk of bias: All or almost of the above criteria were fulfilled, and those that were not fulfilled were thought unlikely to alter the conclusions of the study.
- + Medium risk of bias: Some of the above criteria were fulfilled, and those not fulfilled were thought unlikely to alter the conclusions of the study.
- High risk of bias: Few or no criteria were fulfilled, and the conclusions of the study were thought likely or very likely to alter with their inclusion.
